# Supplementary material for: Adsorption Behavior of 3-phenoxybenzoic Acid by Lactobacillus Plantarum and Its Potential Application in Simulated Digestive Juices
Source: MDPI journal article supplement (doi:10.3390/ijms23105809), 2022-05-22
Supplement: s1 [file s1]

Supplementary materials

Table S1 Physiological and biochemical characteristics of strain RS20

| Table S1                  |      |                  |      |
|---------------------------|------|------------------|------|
| Items                     | RS20 | Items            | RS20 |
| Contact enzyme            | -    | Lactose          | +    |
| Oxidase enzyme            | -    | Maltose          | +    |
| Gelatin Liquefaction      | -    | Mannose          | +    |
| Nitrate reduction         | -    | Cottonseed sugar | +    |
| Indole                    | -    | Salicin          | +    |
| Hydrogen sulfate          | -    | Sorbitol         | +    |
| Arginine produces ammonia | -    | Sucrose          | +    |
| Cellobiose                | +    | 15°C             | +    |
| Esculin hydrate           | +    |                  |      |
