# Supplementary material for: Adsorption Behavior of 3-phenoxybenzoic Acid by Lactobacillus Plantarum and Its Potential Application in Simulated Digestive Juices
Source: MDPI journal article supplement (doi:10.3390/ijms23105809), 2022-05-22
Supplement: s1 [file s1]

Supplementary materials

Figure S1 3-PBA-removal-capacity of lactic acid bacteria strains

Figure S2 Cell morphology and colony morphology of strain RS20

Figure S3 Phylogenetic tree of strain RS20

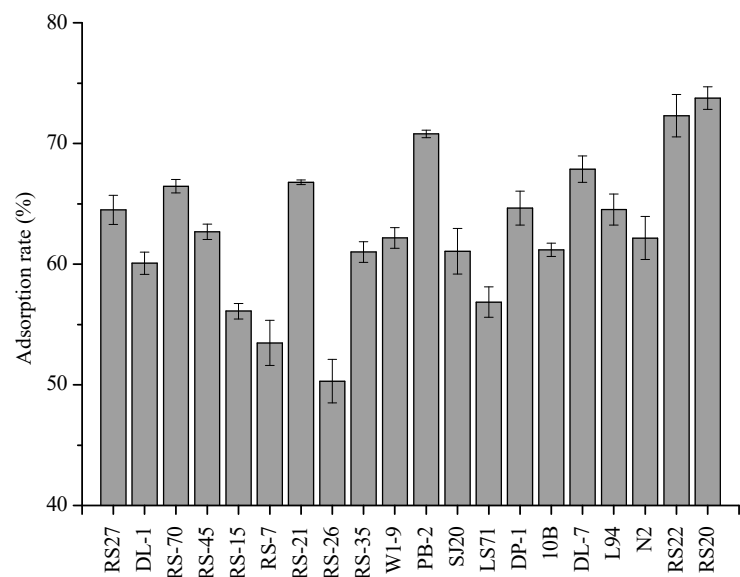

Figure S1

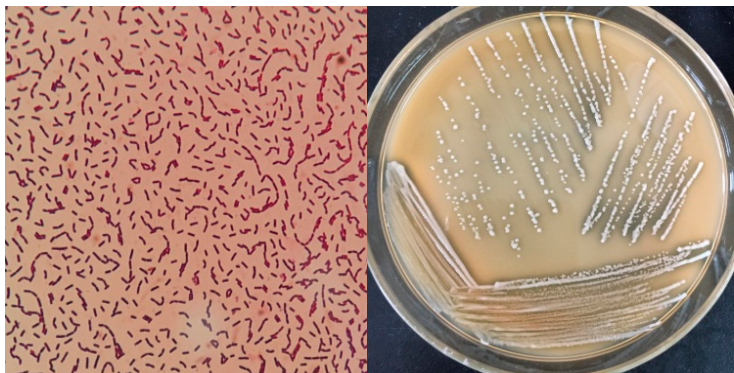

Figure S2

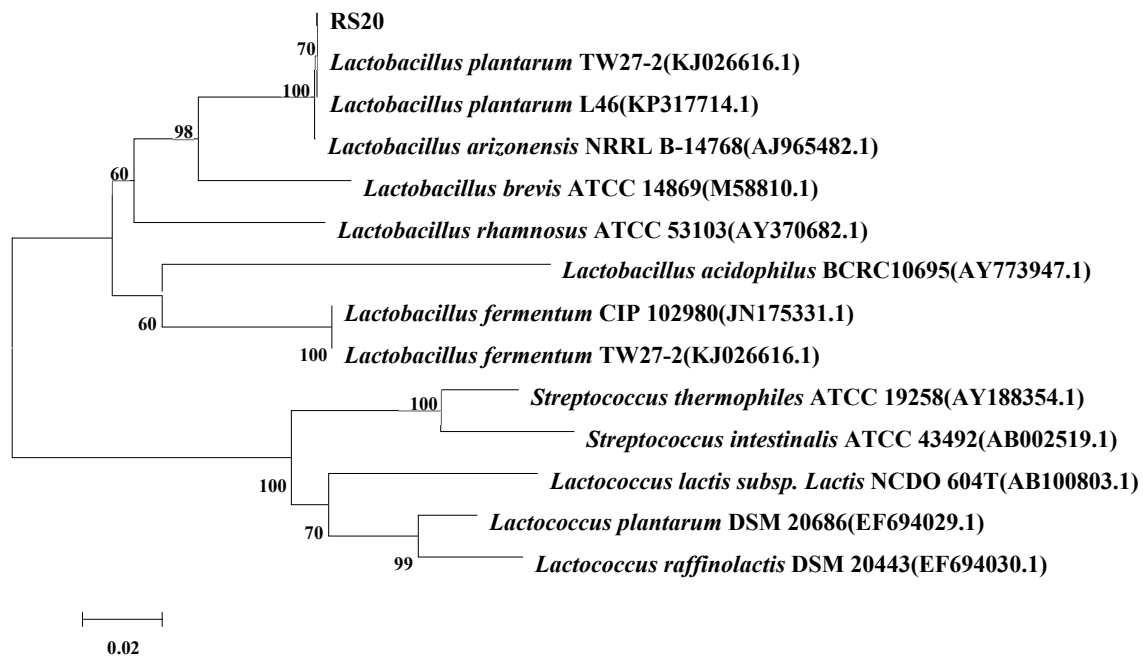

Figure S3
